# Supplementary material for: Determinants of adherence to the Mediterranean diet among individuals with type 2 diabetes mellitus living in Mediterranean countries: a systematic review
Source: Front Nutr. 2025 Feb 3;12:1523995. doi: 10.3389/fnut.2025.1523995 (PMC11830624; doi:10.3389/fnut.2025.1523995)
Supplement: Supplementary file 1 [file Table_1.XLSX]

## Sheet: Sheet1
Author- Reference	Study design	Geographic setting	Aim	Study population (Sample size and characteristics)	Control	Methodology	Intervention	Duration of the study	Exclusion criteria	Assessment tools	MD adherence tool	Compliance with the study protocol.	Outcomes Evaluated	Baseline outcomes	Endline Outcomes	Limitations	Conclusion/ Results.	Determinants of adherence to MD- positive association	Determinants of adherence to MD- Absence of association	Determinants of adherence to MD- negative association
(Martinez-Gonzalez et al., 2012)	Cross-sectional analysis of PREDIMED results	Spain- Primary care centers	Study the relationship between adherence to the Mediterranean Diet (MD) and indexes of abdominal obesity or general obesity	Sample size: 7447. At high risk of cardiovascular disease (CVD): (with T2DM or with 3 to 6 CVD risk factors: current smoking, elevated low density protein (LDL), low high density protein (HDL), hypertension (HTN), overweight, obesity, family history of premature CVD. 48% of the population with type 2 diabetes mellitus (T2DM) (n=3632). Women (60-80yrs)- Men (50-88yrs). 43% male.	low fat diet (following the American heart association guidelines)	7,447 participants were randomly allocated to one of three arms: 1) a traditional MD supplemented with extra virgin olive oil; 2) a traditional MD supplemented with tree nuts; or 3) a control (low-fat) diet.	grp1: traditional MD supplemented with extra virgin oil. Grp2: traditional MD supplemented with tree nuts	4.8 years	Previous history of CVD. HIV. Drug-Alcohol abuse. Allergy to olive oil or nuts. Not ready for a lifestyle change.	14-item MD adherence screener (MEDAS )(by face to face interview). Full-length 137-item validated food frequency questionnaire (FFQ), self-administered. Medical questionnaire. Minnesota Leisure-Time Physical Activity (LTPA) Questionnaire. Weight, height, and waist circumference (WC) were measured. Body mass index (BMI) and waist to height ratio (WHtR) are calculated	14-item MD adherence screener (MEDAS): 3 categories: Low adherence, a score equal or lower to 5, moderate adherence between 6-9, and high adherence for a score of 10 and above	11.3% dropped out from the control group. 4.9% dropped out from the MD groups.	3 adiposity indexes (BMI, WC, WHtR) in relation to MD for both genders. Comparison adjusted to demographic variables and total energy intake. Odds ratios for obesity/abdominal obesity for participants with different MD adherence. Association between items of MEDAS and odds of obesity/abdominal obesity and WHtR.	None	None	Potential bias in the association of adiposity indexes and adherence to MD. (Overweight people are expected to have a greater adherence to MD, they are more likely to change their food habits)	The mean (± SD) of the 14-item score was 8.6±2.0 for the whole population and 8.5 for the diabetic population. Mean values (± SD) for the 14-item score were 8.5±2.0 for women and 8.7±2.0 for men. 50% of diabetic patients had a score of 9 and lower. No difference in average age, the prevalence of HTN, or dyslipidemia across categories of adherence to the MD. No difference in adherence between diab…	Prevalence of a family history of Coronary Heart Disease (CHD). Physical activity. Total energy intake. Alcohol consumption. Educational level. Marriage.	Age and dyslipidemia.	None
(El Achhab et al., 2022)	Cross-sectional	Morocco	Evaluate adherence to MD in patients with T2DM by using the MEDAS instrument, and identify the relationship between MD adherence, demographic, socioeconomic, and other lifestyle parameters.	Sample size: 343. Participants of both sexes, age > 18 years. With type 2 diabetes. 81% are not educated. 86.5% were married. 36.7% (rural habitation)- 42.8% (sub-urban habitation)- 20.4% (modern habitation). 21% perceived their health as poor/very poor. 79% perceived their health as good/average. Age > 18 years with 76% < 65 years. 24% male.	none	Sex, age, weight, height, last clinical and biological measurements were self-reported. BMI calculated. Hypertension was defined with a blood pressure (BP) of ≥140/90 mmHg and/or with antihypertensive medications. Quality of life was evaluated. Adherence to the MD was evaluated	NA	April-July 2019	Those who do not fit with the inclusion criteria	Visual analogic scale through 10 units to evaluate the quality of life. MEDAS was used to asses MD adherence.	MEDAS. (low score of 0–7 points or high score of 8–14 points)	Not mentioned	Adherence to the MD was assessed in relation to: age, habitation, quality of life, physical activity, HTN, oral antidiabetic drug, diabetes complications, medicinal plants, diabesity, diabetes duration, diabetes phytotherapy, control of diabetes and honey consumption.	None	None	Results can not be generalized to Morocco because of the small number of participants. The tool used to assess the physical activity was not valid. The score given to alcohol consumption is a limiting factor to MD Adherence.	The mean score on the screener was 7.8 points (SD 1.2), and ≥8 points (acceptable adherence criterion) in 59% (95% confidence interval, 54–64%).	Advanced age. Suburban habitation. Poor quality of life. Physical activity. Hypertension. Oral antidiabetic drugs. Diabetes complications. Not using medicinal drugs.	No association with: Diabesity . Diabetes Phytotherapy. Diabetes Duration. Controlled diabetes. Using honey.	None
(Grahovac et al., 2021)	Cross-sectional	Croatia	To examine the association between adherence to MD and advanced glycation endproducts (AGEs), an indicator of CVD risk, in patients with type II diabetes.	Sample size 273 with type II diagnosed from at least 1 year. Age: 68.5 ± 12.1. 50% male	None	Measurement of body weight and height, neck, waist, and hip circumference.The waist-to-hip ratio was calculated. Filling out the 3-part questionnaire. Measurement of AGE (through the skin in the right forearm) and creation of 4 groups based on the result	NA	March-June 2019	Type I DM. Newly diagnosed type II (in the previous months to 1 year). Other types of diabetes not mellitus type II	Survey questionnaire of 3 parts: Part 1: general data and habits. Part 2: basic parameters of participants’ diseases and associated conditions. Part 3: the Croatian version of the 14-item MD service score (MDSS). AGE reader to measure to measure AGE level and associated CV risk.	MDSS: Score from 0 to 24. A score of over 13.5 points is considered as good adherence to MD principles.	Not Mentioned	AGEs (CVDrisk) and glycated hemoglobin A1c (HbA1c) levels in both genders. Adherence to MD in relation to CVD risk. Adherence to MD in relation to HbA1c level. MDSS score in relation to disease duration, BMI, and gender.	None	None	Cross-sectional design. The questionnaire relied on memory (recall bias). Possible bias in the measurement f AGEs.	A total of 27 (9.9%) patients fulfilled criteria for adherence to MD, with a median score of 8.0 (6.0-10.0).Higher value of AGEs in men (AGE level:3) than women (AGE level:2.9). Insignificant HbA1c difference between genders. Based on AGE level, 99 persons were classified as having none/limited CV risk group and 174 patients had increased/definite risk. The increase in AGE was paralleled by an in…	Diabetes duration.	None.	BMI.
(Giugliano et al., 2010)	Cross-sectional	Naples- Italy	Exploring the relation between consumption of a Mediterranean-type diet and Erectile dysfunction (ED) in a population of men with T2DM.	Sample size: 555 Men. Type 2 diabetes for at least 6 months but less than 10 years, body mass index (BMI) of 24 or higher, HbA1c of 6.5% or higher, treatment with diet or oral drugs. Age 35–70 years. 100% male	None	Diet was assessed. Weight- height, and BMI obtained. Blood pressure measured. Waist to hip ratio (WHR) calculated. Blood lipid- glucose- HbA1c measured. Physical activity assessed	NA	1 month	Need for insulin use, concomitant chronic diseases, including kidney, liver, and cardiovascular diseases, recent acute illness, or change in diet, treatment, or lifestyle within the 3 months before the initial assessment.	Adherence to MD was assessed by a 9-point scale (range of scores, 0–9, with higher scores indicating greater adherence). ED is assessed using the International Index of Erectile Function-5. Diet history and Semi-quantitative FFQ to assess diet. International physical activity questionnaire (IPAQ) for physical activity assessment.	9-point scale adapted by Trichopoulo et al. 3 subgroups: low (scores of 0–3), middle (4,5), and high (6–9) adherence to an MD was defined	Not mentioned	Adherence to MD and ED.	None	None	Cross-sectional nature of the study. Recommendations for a diabetic diet may somehow influence certain components of adherence to a MD, in a positive or negative way. Lower prevalence of ED in those with the highest adherence to a MD may reflect better self-care behaviors rather than cause and effect. Participants may not represent a random sample of the Italian diabetic population. Hormone statu…	No mean adherence to MD was reported. 28% had low adherence, 48% had a moderate adherence and 24% had a high adherence. Men with lower BMI, waist circumference, and WHR had a higher adherence to the MD (score:6-9). Men with lower prevalence of obesity and metabolic syndrome, and higher physical activity had a greater adherence to MD. No significant differences among the Mediterranean adherence wi…	Physical activity	Age. Blood pressure. Smoking. Diabetes treatment	BMI. - WC. WHR. Metabolic syndrome.
(Vidal-Peracho et al., 2017)	Cross-sectional	Spain	Identify adherence to MD among two groups of Spanish adults: diabetic patients and nondiabetic subjects.	Sample size: 351 (197 diabetics type I or II vs 154 non-diabetics). T2DM= 119 patients. Male and female, 18-90 years. Age of the whole sample: 56.25 ± 13.6 years. Type 1 diabetic subjects: 46.78 ± 12.13 years. Nondiabetic subjects:50.97 ± 12.58 years. T2DM subjects: 64.42 ± 10.87 years. Male: 48% of the whole sample and 55% of diabetic patients. 60% of T2DM were men.	154 Patients non-diabetics	Two groups were selected from one Spanish medical center population: one group of nondiabetic subjects and one group of diabetic patients. Measuring the adherence to MD. Comparison between: 2 groups: diabetic and non-diabetic (for both genders separately) Type I and type II diabetes (separately for men and women) - Age groups 3 categories (18–30/31–60 and 61–90) for diabetic and non-diabetics yea…	NA	Not specified	Inability to process the information. Cognitivie dysfunction	MEDAS (MD score). Diabetes was self-reported	14-item MD adherence screener (MEDAS): 3 categories: Low adherence, a score equal or lower to 5, moderate adherence between 6-9, and high adherence for a score of 10 and above	No drop out mentioned	Adherence to MD. Differences in MD adherence between diabetics and non-diabetics, genders, and age groups. Difference in adherence between type I and type II diabetics. Association of adherence and duration of diabetes.	None	None	The sample may not be representative of the Spanish population. Diabetes diagnosis, was self-reported	Adherence score according to MEDAS is: 8.77 ± 1.82 for the whole sample. 9.06 ± 1.78 for non-diabetics, and 8.54 ± 1.81 for diabetics. No significant correlation between adherence and the duration of diabetes. Non-diabetics had higher adherence to the MD than Diabetics (p=0.006). Difference in adherence between diabetic men and women, diabetic women had less adherence than men (8.15 ± 1.79 in dia…	None	Duration of diabetes. Advanced age. Gender.	None
(Maria Laura Bonaccio et al., 2014)	Prospective cohort study	MOLI-SANI study- Italy	Examine the association between MD adherence and mortality in patients with T2DM.	Sample size: 1995 (from the MOLI-SANI study). Subjects with diabetes. Diabetes was defined as the use of antidiabetic treatment or blood glucose _x0002_126 mg/dl. 37.6% overweight. 51.8% obese. Current smokers: 19.3% and 82.9% with hypertension. 41.2% with hypercholesterolemia. Years from diagnosis of diabetes: <5: 18.2%. 5-11.5:15.6%. >11.5: 16.6%. Unknown: 49.5%. Mean Age 62.6 years. 66.1%.	None	Food intake was assessed. Adherence to MD was evaluated. Anthropometric measurements were taken. Blood Pressure and dyslipidemia were assessed. Physical activity (PA) measured. Educational level identified.	NA	4 years of follow-up. Recruitment period: March 2005-April 2010	Personal history of cancer. Those with unreliable dietary or medical questionnaires. Subjects lost at follow-up. Subject with type I diabetes.	Adherence to MD was assessed using a MD score developed by Trichopoulou et al (score between 0 and 9). FFQ to measure the food intake in the previous year. BMI was calculated. Hypertension was defined as a BP equal or greater than 140mm Hg/80mmHg. Hypercholesterolemia was defined (equal or greater than 240mg/dl). Leisure-time physical activity (LTPA) was assessed by a structured questionnaire. Ed…	MD score developed by Trichopoulou et al (score between 0 and 9). Poor adherence (0–3 points), average (4–5) to high (_x0002_6) adherence.	Not mentioned	Adherence to the MD in diabetic patients in relation to gender, physical activity, diabetes duration, energy intake. Effect of each of the MD components on overall mortality and risk of CVD.	None	None	The relatively small number of recorded deaths (especially cardiovascular deaths).	Overall mean adherence was not mentioned. Men adhered more to the MD than women. Physical activity was positively correlated to MD adherence. Recent diabetes diagnosis is correlated with better adherence. High energy intake was positively associated to MD. Overall mortality decreased by: 14.7% when moderate alcohol intake was removed, by 12.2% when high intake of cereal was removed, by 5.8% when …	Male gender. Physical activty. Recent diabetes diagnosis.	None.	None.
(Roldan et al., 2019)	Descriptive, observational	Spain	To analyse the relationship between the level of adherence to the MD and the control of cardiovascular risk factors.	Sample size: 107 Patients with type II diabetes, are overweight ([BMI] above 25 kg/m2) or obese (BMI above 30kg/m2). BMI at the start was 31.66 kg/m2. At baseline, glycated hemoglobin of 8.55%. Mean age of 61.16 ± 23 years. 44.55% male.	None	MD adherence was evaluated at the beginning and 6 months after receiving a diet education. Monthly: weight measured, glycemia checked, information on diet and lifestyle obtained. The following variables were analyzed: age, gender, weight, height, BMI blood glucose, glycated hemoglobin, total cholesterol, HDL-C, LDL-C, and triglycerides.	6-month education on the MD in medical and primary care nursing consultations.	6 months	Not mentioned	MD Adherence Screener (MEDAS) to check the adherence to the MD	MD Adherence Screener (MEDAS) (score of 9 and more: good level of adherence, score of 8 or less: low level of adherence)	not mentioned	Adherence to the MD before and after educational intervention. Relationship between the following variables and adherence to the MD: gender, age, weight, height, and Body Mass Index. Analytical parameters of blood glucose, glycosylated haemoglobin, total, HDL, LDL cholesterol, and triglycerides.	Score of the MEDAS was low (6.6). No significant association between gender and MD adherence. No statistically significant difference was found between age and adherence to MD. Excess weight and BMI were associated with low adherence. HDL increased wth better adherence. High LDL, cholesterol, TG and HbA1C are associated with poor adherence. Cardiovascular risk increased with low adherence.	Score of the MEDAS was 6.84. No significant difference in adherence between genders. No significant difference between years of diabetes diagnosis and MD adherence. Weight, BMI, HbA1c, blood glucose, and blood lipids improved with adherence. Being overweight and obese are associated with poor adherence to MD. Higher LDL and Higher triglycerides (TG) are associated with low adherence to MD. No ass…	Not mentioned	Post-intervention, adherence to the MD is 6.84 (+0.62), Educational intervention in favor of the MD increases the degree of adherence (from 6.22 to 6.84), improves blood glucose (from 157.41 to 134), HbA1c (8.55% to 7.24%), and controls cardiovascular risk factors.MD score: 6.52 for women and 5.79 for men.	Diet education.	Gender. Age. Diabetes duration.	Excess weight. BMI.
(Petroni et al., 2019)	Cohort study	Italy	Assess the prevalence of dysfunctional eating in a large population of people with T2DM in Italy recruited in a real-life multicenter clinical setting, as well as its association with sociodemographic characteristics.	Sample Size: 895 .Years of diabetes 50.5% more than 10 years. BMI:31.4 ± 6.9 71.4% Non smoking. 64.3% were living with a partner. 9.5% had a university degree. Age:66.1 ± 9.3. 54% male	None	Demographic data, diabetes history, and treatment were collected. Weight, height, and waist circumference were measured. Plasma glucose, HbA1c, lipid profile, renal and liver function were measured. Eating habits questionnaires are to be filled in either before or following the study visit .	NA	September 2015-June 2017 (recruitment period)	Previous diagnosis of psychiatric illness, and inability to fill in the questionnaires because of visual or movement defects	Anthropometric measurements. Blood test. Questionnaires: Eating Attitude Test (EAT). Binge-eating scale. Night Eating Questionnaire (NEQ). MD score (MDS). Quanto Mangio Veramente (How much do I really eat; QMV, 20 items)	MD score (MDS- 11 items)scored as per the following: optimal, good, fair, scarce and low at the respective cut-offs: ≥45, 44-34, 33-23, 22-12, ≤ 11	Not mentioned	Prevalence of eating disorders. Association of eating disorders with demographic data (age, gender, education, marital status, calorie intake, duraion of diabetes biochemical or clinical variabes)	None	None	Lack of confirmatory diagnoses by specific interviews (Eating Disorder Examination EDE and Night Eating Syndrome history and inventory NESHI) and a more comprehensive assessment of the psychological characteristics frequently associated with, and possibly promoting, formal eating disorders (EDs). T2DM individuals with binge eating disorder (BED) or night eating sydrome (NES) have a significantly …	MDS score was 29.6 ± 5.7 in the total population. 29.6 ± 5.4 in women and 29.7 ± 6 in men (p value :0.802). Dysfunctional eating was more prevalent in women than men. The prevalence of positive test (filled-in questionnaires) was not associated with education, marital status, or job. NEQ cases were more common in individuals living alone. Age is associated negatively with eating disorders. With a…	Education.	Total calorie intake. Sociodemographic factors.	None
(Kudret et al.,2023)	Cross-sectional	Turkey	Evaluate the relationship between compliance of T2DM patients with the MD and the quality of life and examine the possible relations between these two parameters.	Sample size: 200 patients with T2DM. BMI <40. Cooperative and volunteers. 14.5% of the individuals were using alcohol (mostly men). 69.5% had comorbidities in addition to diabetes (HTN and CVD). 31.5% of the patients developed diabetes-related complications (no difference between genders). Treatment options: oral antidiabetics (OAD), insulin, OAD+insulin and those on diet alone (no difference bet…	None	Assess sociodemographic variables, dietary habits, adherence to MD, physical function, physical indicators, mental score and Quality of life. Taking anthropometric measurements (weight, height, waist circumference, hip circumference, BMI, waist/hip, waist/neck, and waist /height ratio)	NA	Data collection: between November 2015 and March 2016	Not mentioned	Questionnaires on socio-demographic characteristics, diabetes, treatments, nutrition habits, 14-item MEDAS questionnaire, and SF-36 Quality of Life Scale (It consists of eight sub-headings; physical indicators; physical function, physical role, pain, general health; mental indicators; vitality, social function, mental role, and mental health). Anthropometric measurements were taken.	14-item MD. Adherence Screener (MEDAS). Score evaluated as ≤5 low, 6–9 moderate, and ≥10 high compliance.	Not mentioned	Adherence to the MD in relation to: Health, BMI, treatment methods, physical function, mental function and physical indicators. Relation between demographic factors and mental role score. Effect of educational level on quality of life. Effect of diabetes duration on physical and mental status and quality of life. Relation between HbA1c and MD compliance and SF-36 components.	None	None	Not mentioned	39.0% of patients had low compliance with the MD (score ≤5). 56.5% had moderate compliance (score:6-9), and 4.5% had high compliance (≥10). No significant difference between genders in terms of adherence to the MD: 30% of men had low compliance versus 46.4% of women, 65.6% of men had moderate compliance versus 56.5% of women, 4.4% of men had high adherence versus 4.5% of women. Age, educational s…	None	Gender Age Educational status Marital status Occupation Smoking Alcohol use BMI Physician follow-up Exercise status	None
(Yilmaz and Yangilar.,2022)	Descriptive, cross-sectional, and cross-analytical study	Turkey	Evaluate the relationship between chronotype, adherence to a MD, and cardiometabolic health in adults.	Sample size: 205. 38.5% overweight, 14.6% obese, 42.4% normal BMI and 4.4% underweight. 9.3% of the participants stated that they had cardiovascular disease. 8.3% stated that they had type 2 diabetes. 20.5% smokers. 13.2% drink alcohol. 57.6% of the adults are university graduates and 42% were civil servants. Between 18-65 years old. 34% male	None	Filling out a questionnaire that contained the general information form, anthropometric measurements, cardiometabolic health status, chronotype, and adherence to the MD. Online survey was made available through e-mail or social media (WhatsApp).	NA	2months	Not mentioned	Questionnaire on socio-demographic characteristics. Anthropometric measurements (weight, height, BMI, waist circumference). Assessment of chronotype by: The Horne and Ostberg Morningness-Eveningness Questionnaire (MEQ), 19-item self-reported questionnaire (score from 16-86). 59-86 determine the morning type, 42-58 intermediate type, and 16-41 evening-type groups. Adherence to the MD by 14-item PR…	Adherence to the MD by 14-item PREDIMED. Level of adherence: ≤5 points are low, 6-9 points are moderate, and ≥10 points are high.	Not mentioned	Relationship between: chronotype and adherence to the MD. Chronotype and cardiometabolic health.	none	None	Cross-sectional nature makes it difficult to find causality. The sample size was small. Anthropometric measurements were based only on self-reported data. Socioeconomic level and sleep quality were not recorded. Study population was unbalanced regarding gender and age (this bias was minimized by adjusting statistical analysis).	Results of the chronotype questionnaire: 20.5% of the participants are morningness type, 67.8 % intermediate type, and 11.7% eveningness type. The median PREDIMED score was 6. 46.3% had low adherence, 51.7% had medium and 2.0% had high. A significant difference was found between the participants’ age, BMI classification, and occupation according to chronotype. A significant inverse relationship w…	None	Chronotype categories	Waist circumference.
(Sanchez-Hernandez et al., 2020)	Cross-sectional DM2-CUMCYL study	Spain	To analyse the association between adherence to treatment and glycaemic control in people with T2DM	Adults with physician-diagnosed T2DM. Diagnosis of T2DM since at least 2010 (1 year prior to the recruitment). Sample size: 3536. 54.5% rural population. 57.9 % primary education.68.7% married. 13% employed. 66.8% never smoked. 42.4% overweight. 19.8% are sedentary. 62.4% had a family history of diabetes. Mean time since diabetes diagnosis:9.5 years. Mean age:69.5 years. 51.5% male	None	Sociodemographic and clinical characteristics were collected. Adherence to the MD was measured.Medical records reviewed. Anthropometric measurements taken	NA	3 months	Moderate or severe cognitive impairment; major dependency.	A self-administered questionnaire, reporting behavioural and demographic data (date of birth, gender, education, marital status , tobacco use, and family history of T2DM. 4-item Morisky-Green Medication Adherence Scale (MMAS-4) for medication adherence. 14-item MD Adherence Screener (MEDAS) for MD adherence. Medical records to probe for other medical information (prescribed medication, height and…	14-item MD Adherence Screener (MEDAS). Low-to-moderate adherence group(<9 points) or the moderate-to-high adherence group (≥9 points).	Not mentioned	Adherence to MD and its socio-demographic determinants. Adherence to Medication and its relation to socio-demographic factors. Dabetes control and its association with socio-demgraphic factors.	None	None	The cutoff point of 9 in the 14-item MEDAS score may seem arbitrary, but it was chosen based on the results of studies preceding the PREDIMED trial. Physical activity level was self-reported and not assessed based on a validated questionnaire. HbA1C levels, were the most recent in the medical record. Adherence to medication could more reliably measured than usin g the Morisky questionnaire. The n…	Mean score of MEDAS was not reported. 2699 participants completed the MEDAS with a total of 49.4% having poor/moderate adherence (score < 9) and the remaining having moderate to high adherence. 49.3% of men versus 49.4% of women had poor/moderate adherence and the remaining percentages were attributed to moderate/high adherence for both genders. A third (33.8%) reported non-adherence to pharmacol…	None.	Gender. Age. Diabetes duration.	Low educational level. Sedentarism.
(Bucan Nenadic et al., 2022)	Cross-sectional	Croatia	To determine differences in adherence to the MD and nutritional status in patients with type 2 diabetes mellitus and arterial hypertension (AH) regarding the presence of chronic kidney disease (CKD).	Sample size 248. patients with T2DM and HTN. 66.1 % of them had a CKD. Average BMI:30.45. The average duration of diabetes and HTN treatment was 10 years. 19.4% smokers. Mean age: 68 (60-74). 57.6% male.	84 Patients with T2DM and HTN without CKD.	Body composition assessed. Anthropometric measurements were taken. Peripheral blood pressure was measured. Questionnaires for socio-demographic data and to measure adherence to a MD. Data on the treatment methods were obtained from medical records. Blood and urine tests were done.	NA	around 1 year	Those with implanted pacemaker or cardioverter defibrillator, stents, or limb amputation. Those with active underlying malignant disease or active infection; and those who refused to participate in the study	Body composition assessed by the bioelectrical impedance analysis BIA (measures body mass (kg), muscle mass (kg), fat free mass (kg), fat mass (kg) and fat mass percentage (%), visceral fat, trunk fat mass (kg) and trunk fat mass percentage (%), skeletal muscle mass (kg) and skeletal muscle mass percentage (%), skeletal muscle index (SMI), and phase angle ). Measurement of mid-upper arm (MUAC), h…	MD Serving Score (MDSS). Score from 0 to 24. Optimal adherence with a score >14pts	Not mentioned	Differences in nutritional status and adherence to Md Diet i in Dalmatian diabetic hypertensive patients (DDHP) regarding the presence of CKD from the Mediterranean region, Dalmatia, Croatia.	None	None	Small number of participants was included (yet representative). The cross-sectional nature of the study doesn't allow causal conclusions. Possible bias in determining MD adherence could be caused by self-administration of the questionnaire (low reliability). Data about participants' income and level of education are lacking.	Out of all study participants, only 24 (8.9%) scored 14 or more points on total MDSS. 8.3% of non-CKD patients versus 9.1% of CKD patients had a score of 14 or more on MDSS. The highest adherence for each MeDi component was found for potatoes (99.6%), cereals (71.8%), and sweets (70.2%), whereas the lowest was for olive oil (16.9%), alcohol (13.7%), and nuts (8.5%). No significant difference in a…	None	Presence of CKD in T2DM when compared to T2DM patients without CKD.	None
(Ortega et al., 2013)	Cross-sectional	Spain Di @ bet.es Study	Compare adherence to the MedDiet between individuals with normal glucose status and high-risk subjects with PREDM/UKDM as well as between individuals with normal glucose status and those with known diabetes (KDM)	Sample size: 5,076. ≥ 18 years. 478 individuals with known diabetes mellitus (KDM). 582 with Prediabetes (PREDM). 244 with unknown diabetes mellitus (UKDM). 3772 NORMAL without diabetes. PREDM-KDM-UKDM had higher BMI than NORMAL subjects. The mean age for those with PREDM-KDM-UKDM: 61.66 years. Mean age for NORMAL: 45 years. 42% male	Normal individuals without diabetes	Examination visit at the primary health care center. Information collected, and physical examination done. Socio-demographic information collected. Medical history obtained. Oral glucose tolearnce test (OGGT) performed . Weight, height and waist and hip circumferences measured. Adherence to MD measured.	NA	1 year	Institutionalized, severe disease, pregnancy or recent delivery.	A qualitative food frequency questionnaire (FFQ) was administered face-to-face by a dietitian. Panagiotakos’ score for the MD Adherence	Panagiotakos’ score adapted (ATTICA study). A score of 5 to 0 for each item. (a score of 5 for the ideal frequency of consumption, scores of less than 5 for fewer servings proportionately, and a score of 0 when rarely consumed). The total score ranges from 0-50 (greater adherence with higher values).	Not mentioned	Adherence to MD in relation to age, gender, smoking, education, presence/absence of diabetes in the 3 groups	None	None	A reverse causality bias, a usual suspect in these cross-sectional studies, was less likely to occur in this group of PREDM/UKDM individuals who were not aware of having the disease than in those withKDM, in whom no apparent, direct or even inverse association with MedDiet adherence can be found. Nondifferential misclassification is another possible source of bias in nutritional epidemiology. In …	With age, adherence to the MD increases. The mean (±SD) med score was 24 ±5. Age is associated with higher BMI and WC. MD score was lower in individuals with obesity, central obesity, non-married, without a university education, active smokers, those not exercising at least once a week, and those with hypertension. No difference in adherence to MD between genders. A similar adherence to the MedDi…	Age University education.	Gender. Dyslipidemia. Coronary heart disease. Family history of diabetes.	Obesity / central obesity. Not married status. Active smoking. Sedentarism (absence of PA).
(Downer et al., 2016)	Cross-sectional	Spain- PREDIMED randomized trial	Identify predictors of short and long-term adherence with a MedDiet intervention in patients with high risk of CVD.	Sample size: 4198 (1962 on EVOO and 2236 on tree nut diet). At high risk for developing cardiovascular disease (CVD). High risk: having type 2 diabetes or at least three of the following major (CVD) risk factors: current smoking, hypertension, elevated low-density lipoprotein cholesterol levels, BMI ≥25 kg/m2, or a family history of premature coronary heart disease (CHD). 47.6% had type 2 diabete…	Group with control diet. Diet low in fat. (present in the initial study as PREDIMED). In the present study the control group was excluded.		2 intervention groups: Group 1 (n=1962): a traditional MedDiet supplemented with complementary extra-virgin olive oil (EVOO). Group 2 (n=2236): Traditional MD supplemented with tree nuts. Dietetic counseling sessions with dietitians at baseline and throughout the study (every 3 months). 1 year and 4 year- follow-up.	4.8 years (ended in 2010)	Participants with insufficient adherence information	14- item MD assessment tool. Blood test. 137 FFQ questionnaire. Another questionnaire collected information on sociodemographic variables, lifestyle, and family history data. A validated Spanish version of the Minnesota questionnaire was used to assess physical activity. Dietary counseling sessions. Blood pressure measurements. Medical records were reviewed at baseline and yearly thereafter to as…	14-item MD Assessment. High adherence (≥11 and low adherence <11 points on a 14-point score)	54 % of participants complied at one-year follow-up, and 58 % at 4- y follow-up.	Effect of the following factors on adherence to the MD: Sex(male, female), age (<65 years, ≥65 years), educational level, occupation, marital status, number of people in the household, continuous CVD risk factors, smoking status, and alcohol Intake.	The following are associated with low adherence to the MD: Female sex, greater number of CVD risk factors, larger waist circumference, less physical activity, less total energy intake, type 2 diabetes, and obesity.	At 1 year: The following are associated with low adherence to MD: Type 2 diabetes, high WC, lower 14-pt baseline adherence score. At 4 years: The following are associated with low adherence to MD: high number of CVD risk factors, type 2 DM, hypertension, family history of premature CVD, low physical ativity, low energy intake and allocation to MedDiet + EVOO. At 4 years, no association was found …	Potential for measurement error. Recall bias, social desirability bias, and differential misreporting are always possible when the diet is self-reported. Possible failure to control for unmeasured confounder.	Check the"endline outcomes"	Larger group follow-up in a medical center.	Education	Female sex. Greater number of CVD risk factors Larger waist circumference Less physical activity. Less total energy intake. T2DM. Lower 14-point baseline adherence score. Obesity. Hypertension
(Badrasawi et al., 2021)	Cross- sectional	Palestine	assess the quality of life (QoL) of DM patients who adhered to MD	Sample Size: 106 patients Inclusion criteria: patients of DM II aged 18 years and above, having had DM II for a duration of 6 months or more, and receiving treatment at the primary health care clinic. 58% of the participants were overweight and 35% were obese. The prevalence of abdominal obesity was 92.3% among the males and 95.5% among the females. Diabetes mean duration: 9.5±8.5 years. 2.8% of …	None	Patients recruited from health care center. Sociodemographic information was collected, lifestyle habits, and self-reported medical history. Anthropometric measurements were taken and adherence to MD was measured. Quality of life was assessed.	NA	1 month	DM II duration of less than six months. Diabetes mellitus tpe I. Not meeting the inclusion criteria.	Arabic version of the SF-36 questionnaire to measure the patient’s QoL. It measures eight distinct dimensions of current QoL (score from 0-100 for each). MEDAS from MD adherence	14-item MEDAS questionnaire. Low adherence below 5 (≤5); moderate adherence anywhere between 6 and 9; and high adherence≥10..	Not mentioned	Quality of life (QoL). Adherence to the MD.	None	None	The heterogeneity of the sample did not enable it to reach a solid conclusion about some issues related to QoL. Participants who reported a low MD adherence or normal body weight were small in number, and this made it difficult for us to compare all the QoL domains across all DM features.	QoL scores were higher among patients with a normal W:H ratio as compared to patients with abdominal obesity. QoL scores differ significantly across the BMI categories. 53.8 % had low/moderate categories of adherence and 46.2% had high adherence categories. The average score of the high adherence group was 10.78±0.9, while that of the low/moderate group was 7.39±1.4. A significant association bet…	Male gender.	Abdominal obesity (Waist circumference).	None
(Alcubierre et al., 2020)	Cross-sectional. It is a sub-study using the cohorts of two previously published studies.	Spain.Lleida	To assess the dietary pattern (i.e., MD (MedDiet) and healthy eating) in people with type 2 diabetes (T2D) compared with those without diabetes and explore clinical factors associated with this dietary pattern.	Sample of 476 participants (238 with T2D and 238 participants without diabetes, matched for age and sex). Participants with T2D were recruited at the University Hospital. Non-diabetic individuals were randomly selected from the population-based study from the same area. In the T2D group, the inclusion criteria were as follows: diagnosis of T2D, and age between 40 and 75 years. In the group withou…	238 patients without diabetes	For both groups: collection of clinical and sociodemographic data.blood samples and anthropometric variables were collected. Physical activity was assessed. Diet quality was assessed.	NA	Recruitment period: March 2010 and July 2014	In the group with diabetes: The exclusion criteria were as follows: being a healthcare professional, participants who showed cognitive deterioration, such as dementia and mental diseases; presence of macrovascular complications, previous diabetic foot disease, macroalbuminuria (defined as a urine albumin/creatinine ratio over 300 mcg/g), renal failure (defined as a glomerular filtration rate < 60…	Bernstein et al method to determine physical activity level. Educational level was determined. Tobacco exposure was noted. The diet was assessed using HEI (score from 0-80), FFQ (Willet questionnaire), and alternate MD (aMED).	aMED: includes nine key components of the traditional MedDiet: The score ranges from 0 (minimal adherence) to 9 (maximal adherence).	Not mentioned	Alternate MD (aMED) score and the alternate Healthy Eating Index (aHEI) score were calculated and determinants of adherence were identified.	None	None	The cross-sectional study design did not allow a causal relationship between variables and study outcomes. This was a sub-study of previous studies, mainly designed to assess the quality of life and treatment satisfaction of participants with T2D and the prevalence of prediabetes, patients with T2DM received most probably an education about the appropriate diet.	Participants with T2DM when compared to the control group have: A higher BMI, a higher Waist Circumference (WC), a greater HbA1c, and a greater TG concentration. T2DM patients were more sedentary than the control and had a lower HDL level, a lower total CT, and a lower LDL. Adherence to the MedDiet and healthy eating patterns was greater in T2DM group( mean (SD): 4.3 (1.5) ( when compared to the …	Presence of T2DM Increasing age. Level of physical activity Presence of dyslipidemia.	Female gender HbA1c BMI.	None
(Muñoz-Pareja et al., 2012)	Cross-sectional. Taken from ENRICA study.	Spain	To evaluate accordance of the diet of diabetic adults in Spain with nutritional recommendations of the European Association for the Study of Diabetes (EASD), American Diabetes Association (ADA), and the MD.	Sample size: 609. Inclusion criteria: Men or Women> 18years, FBG ≥ 126mg/dL, use of anti-diabetic agent, diagnosis of diabetes made by a physician, the patient should be aware of his diabetes and energy intake should be > 800 and < 5000 in men and <500 and < 4000 Cal in women. Patient should complete all the required information. Education: Primary school or less:56.9%. 48.2% never smoked. 47.1% …	None	Blood glucose and HbA1c were measured. Diet quality was assessed in accordance with the European Association for the Study of Diabetes ( EASD), American Diabetic Association (ADA), and MD recommendations. Weight- height, WC, and BMI were obtained. Socio-demographic factors were collected, and Blood pressure was measured. Physical activity measured	NA	2years and 4 months. 2008-2010	Not meeting the inclusion criteria	Dietary assessment tools: EASD score (European Association for the Study of Diabetes) that ranges from 0-12, moderate accordance to EASD is given for a score ≥ 6. ADA score from 0-6 with moderate accordance given to a score of ≥ 6. MEDAS score from 0-14 with a moderate accordance given to a score of ≥7. Physical activity measured using the EPIC questionnaire.	MEDAS score from 0-14 with a moderate accordance given to a score of ≥7.	Response rate: 51%	Accordance with the EASD, ADA and MD recommendations.	None	None	cross-sectional design, which does not allow to infer causality for some of the associations found.The response rate (51%) in the ENRICA study is also a cause of concern, cannot rule out that those who were more health-conscious were more inclined to participate. The definition of diabetes was based only on a single blood glucose and diabetes was self-reported. Probable Bias in the sodium consump…	Diabetic patients follow a diet rich in SFA, low in trans-fat, high in MUFA, low in carbohydrates, high in sugar, high in cholesterol and sodium. 69.2% have a good glucose control. Mean score for EASD was 5.5 and 48.7% of the patients had accordance with EASD. The mean score for ADA was 2.55 and 46.3% had accordance with the ADA recommendations. MEDAS mean score was 6.83(95% CI 6.65–7.02), and 57…	Advanced age ≥65 years.	Gender after eliminating the goal of wine consumption from the MEDAS score (OR 0.79; 95% CI 0.50–1.27).	Female Gender (when respecting the MEDAS)
